# Supplementary material for: Caco-2/HT29-MTX co-cultured cells as a model for studying physiological properties and toxin-induced effects on intestinal cells
Source: PubMed Central journal article supplement (PMC8496855; doi:10.1371/journal.pone.0257824), 2021-10-07

pSGLT1

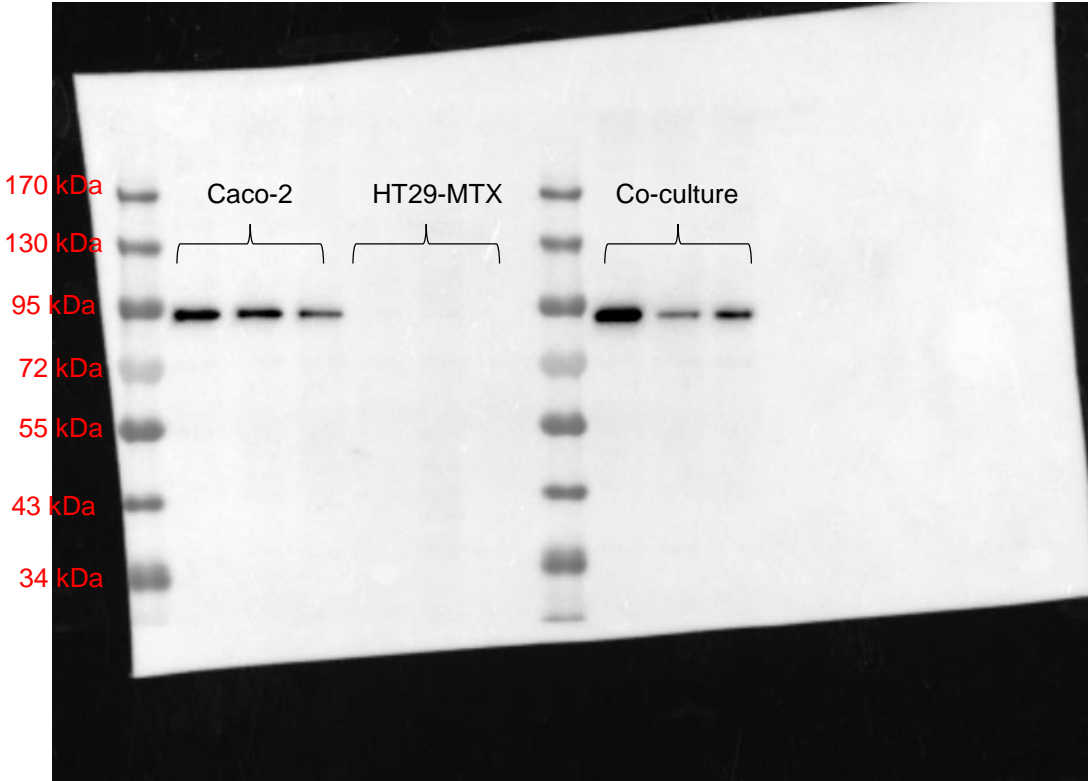

SGLT1

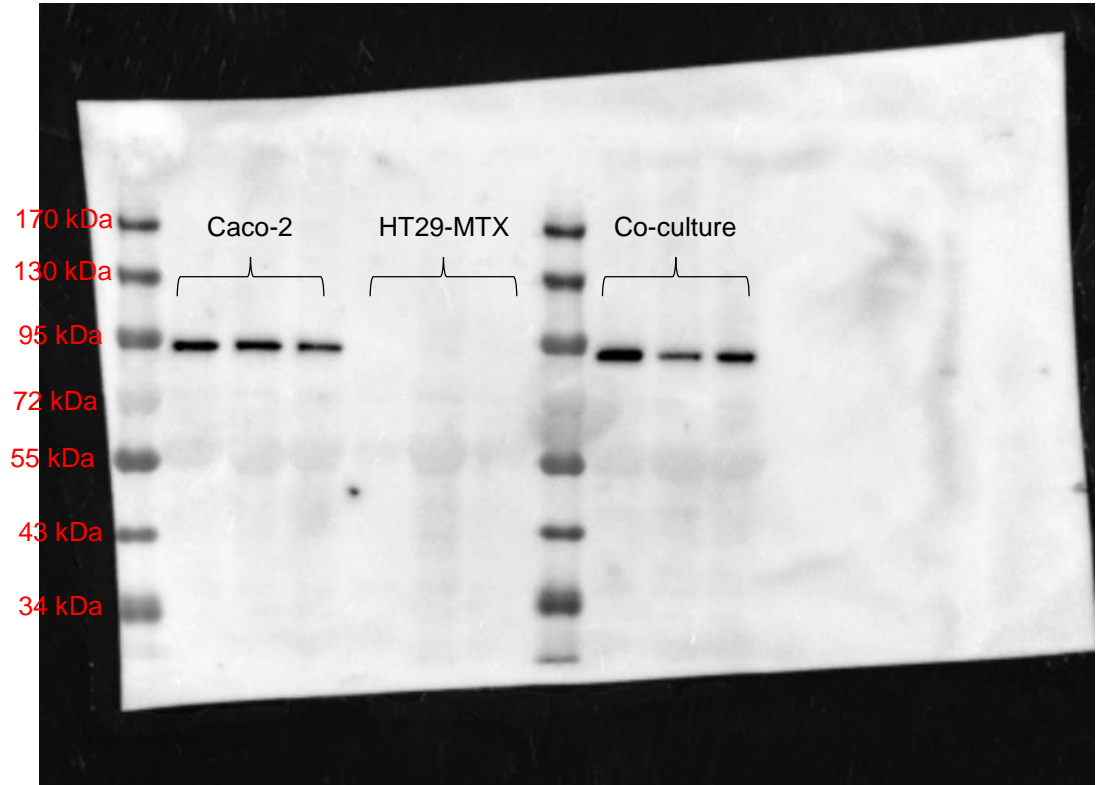

villin

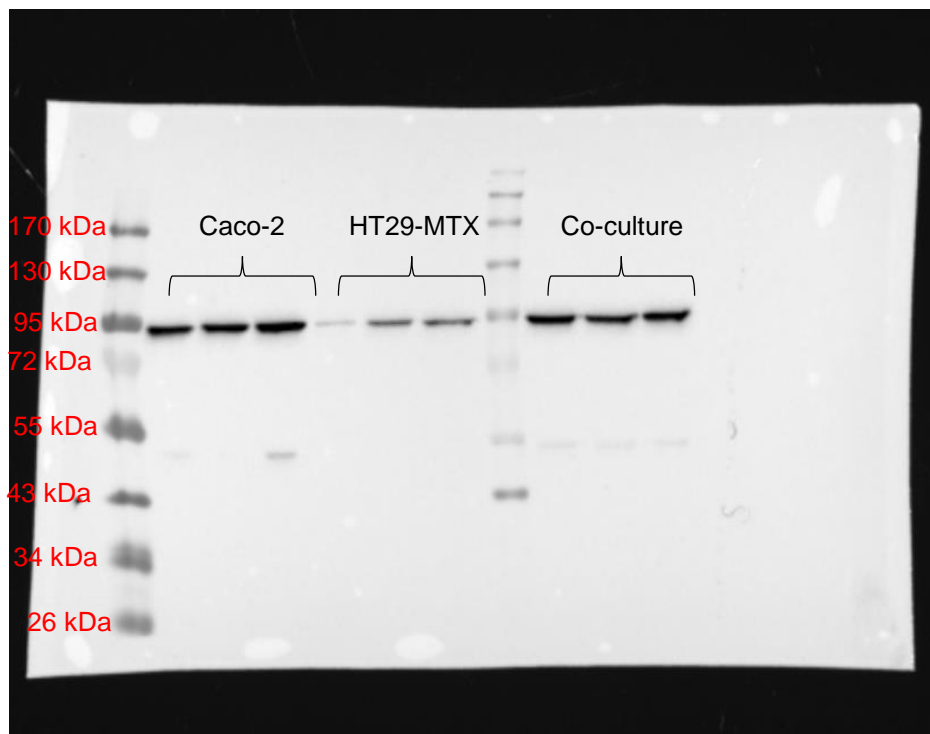

total protein

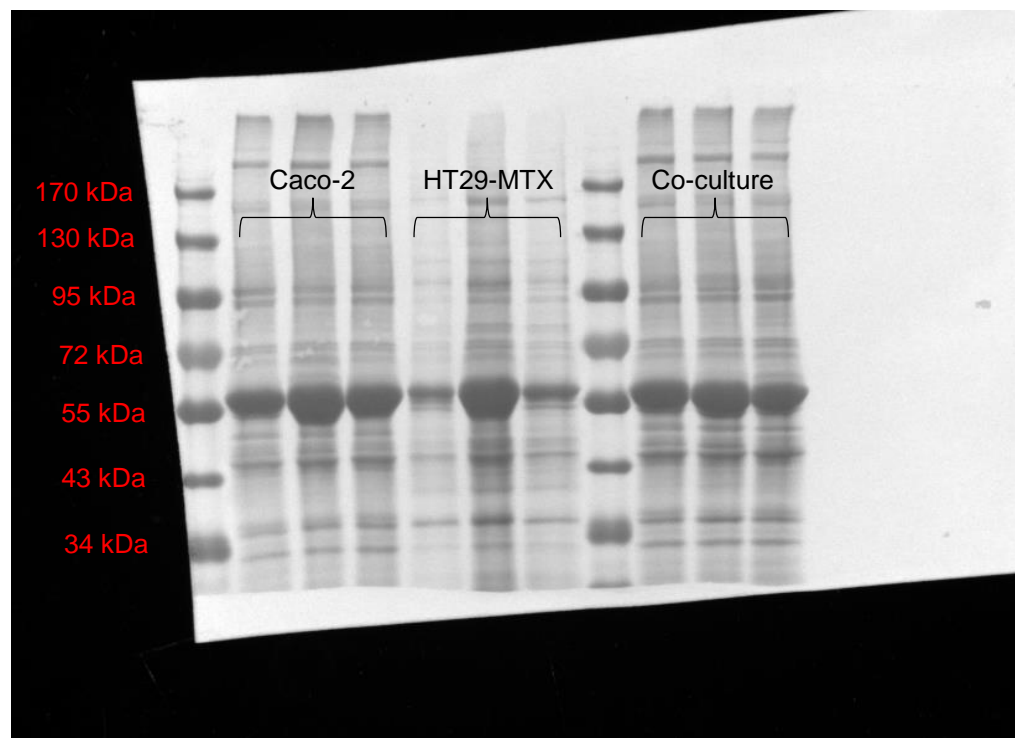

PepT1

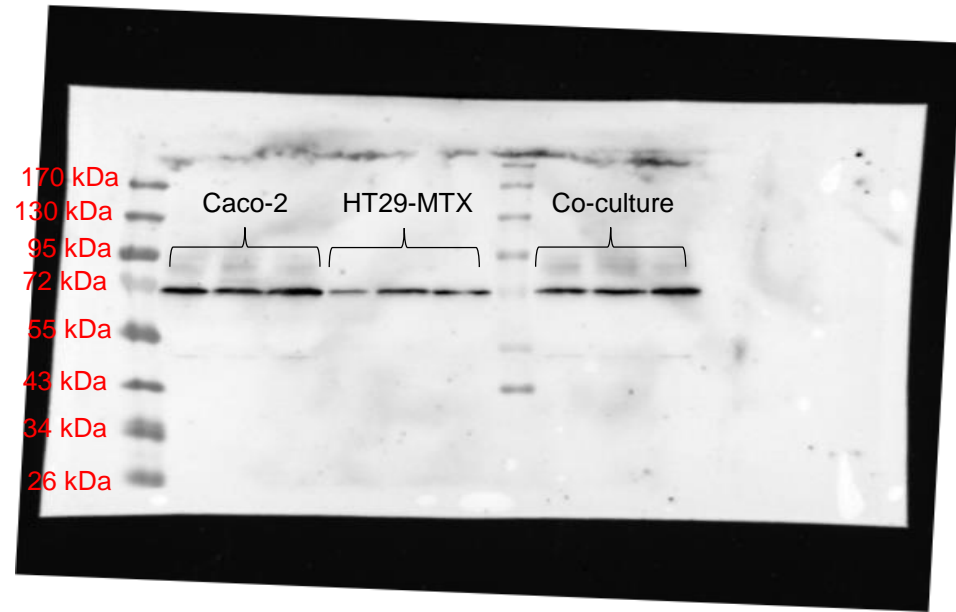

CFTR

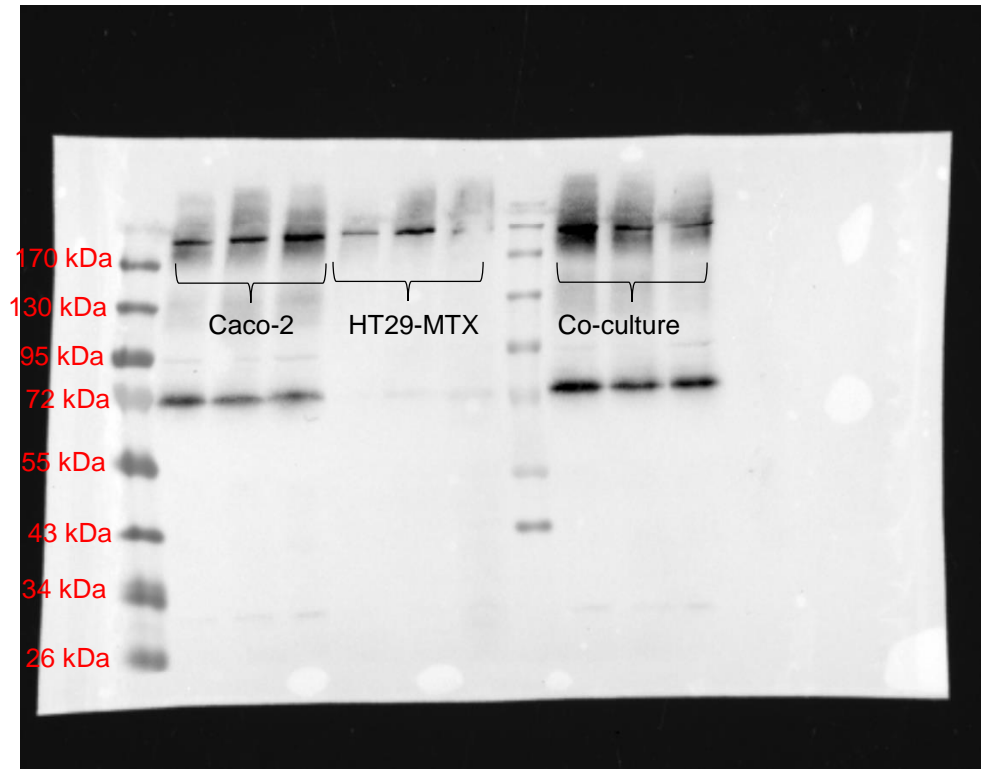

Supplement: pone.0257824.s002.pdf [file pone.0257824.s002.pdf]
